# Supplementary material for: Experimental Infection of Mid-Gestation Pregnant Female and Intact Male Sheep with Zika Virus
Source: MDPI journal article supplement (doi:10.3390/v12030291), 2020-03-07
Supplement: s1 [file s1]

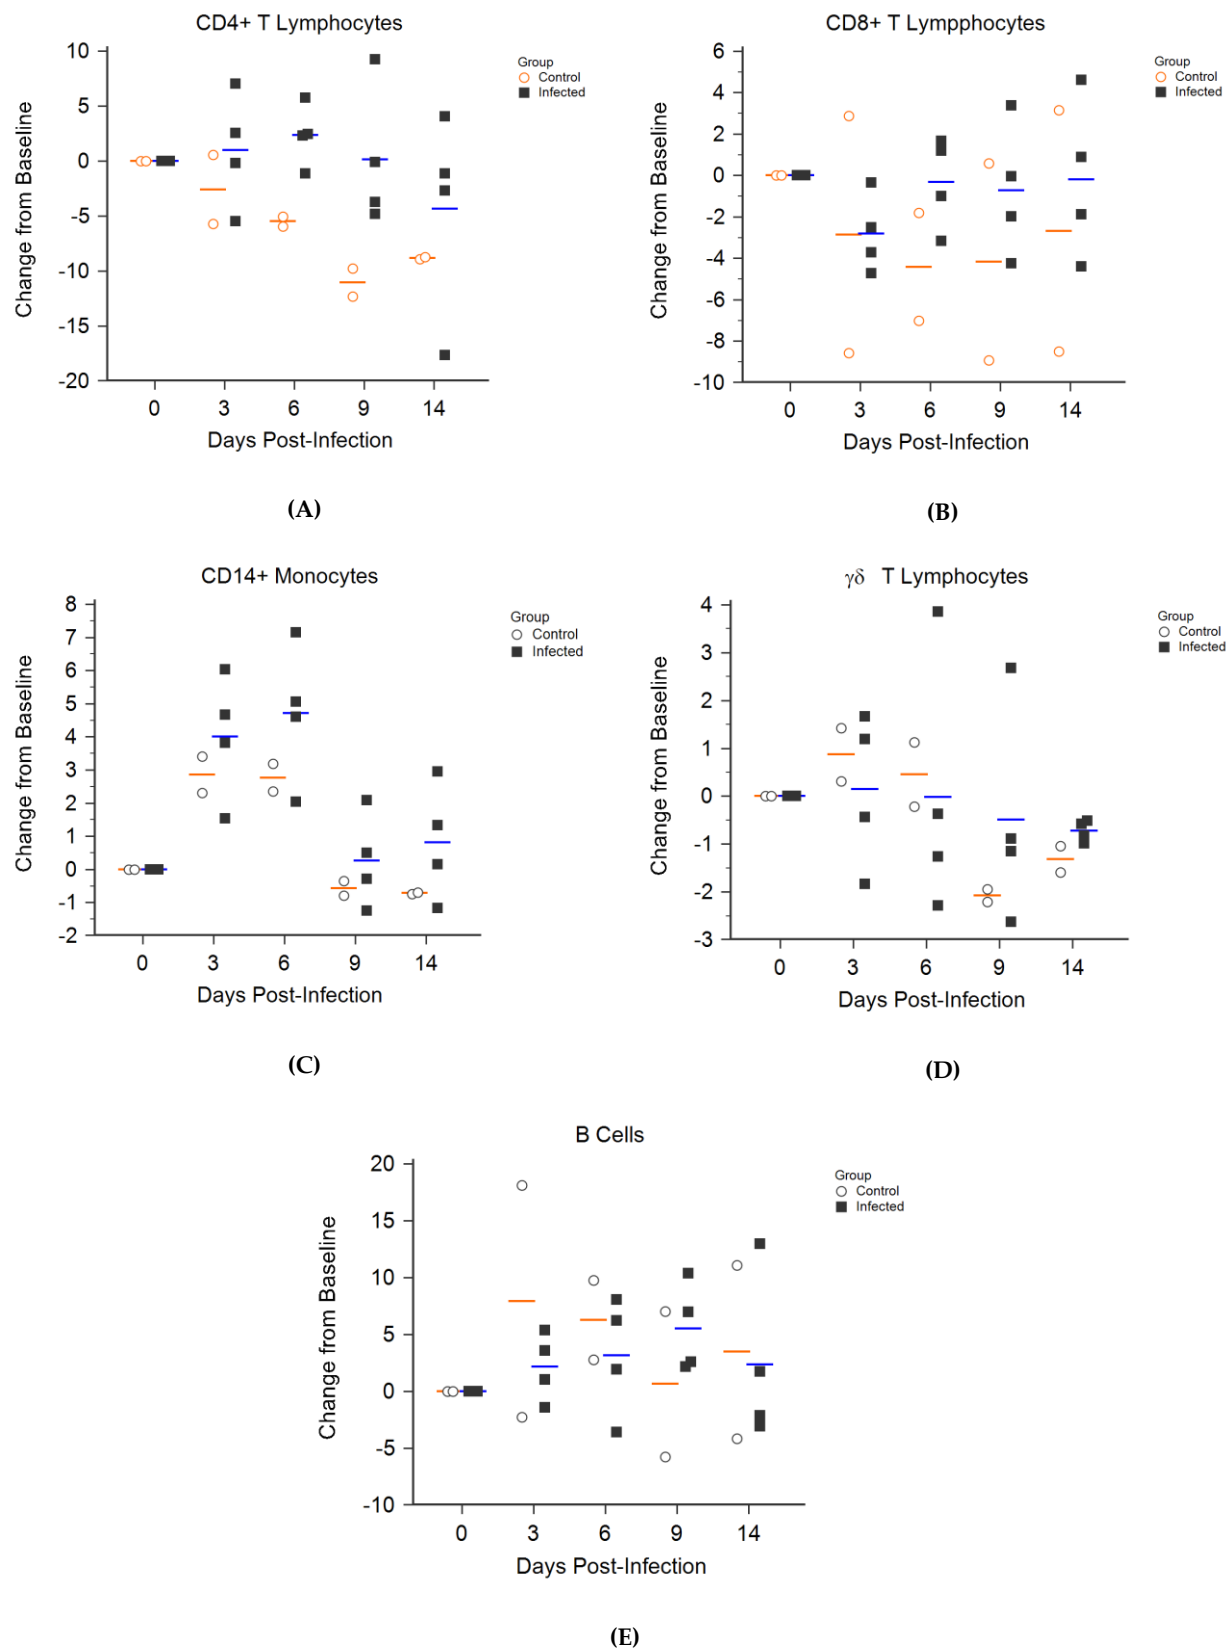

**Figure S1.** PBMC phenotypes measured by FACS over the course of the study period, reported as the change in percentage of cells from initial pre-infection measurement (standardized to 0 on the y-axis); horizontal lines indicate the mean change in percentage for each group, where blue represents infected animals and orange represents control animals. Specific phenotypes measured included: A) CD4+ T lymphocytes; B) CD8+ T lymphocytes; C) CD14+ monocytes; D)  $\gamma\delta$  T lymphocytes; and E) B cells.
